# Supplementary material
Source: PubMed Central journal article supplement (PMC5500824)
Supplement: mmc4.pdf [file mmc4.pdf]

### Multiplex assay

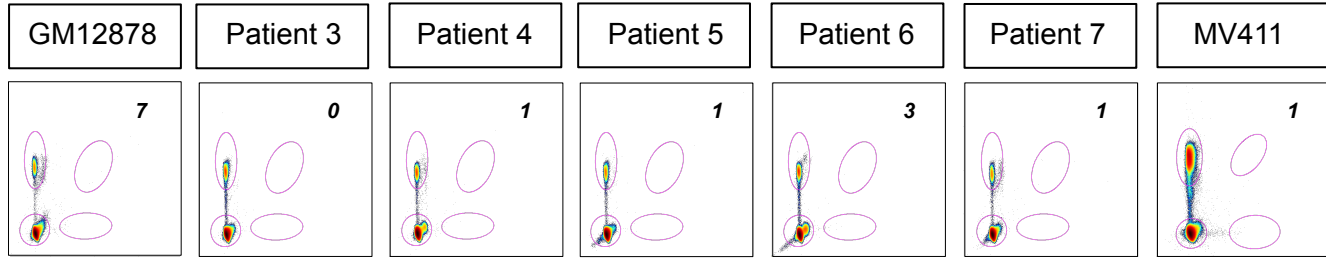

### Type-specific assay (NPM1 type A)

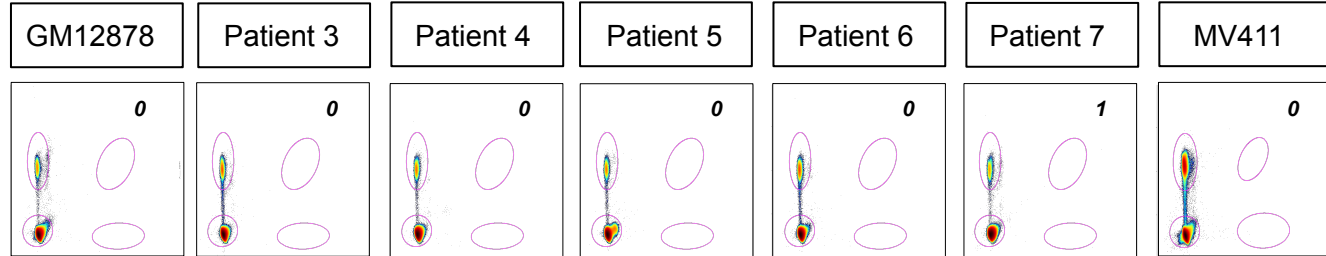

### Universal assay

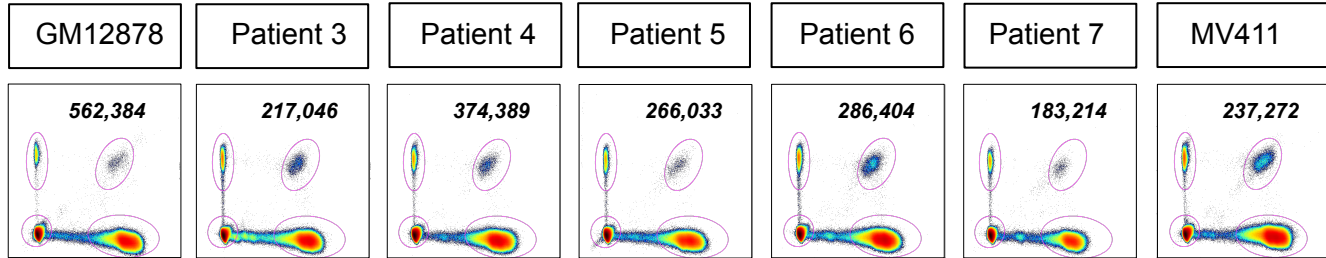

NPM1mut droplet fluorescent signal intensity
