# Supplementary material
Source: PubMed Central journal article supplement (PMC5500824)

**A**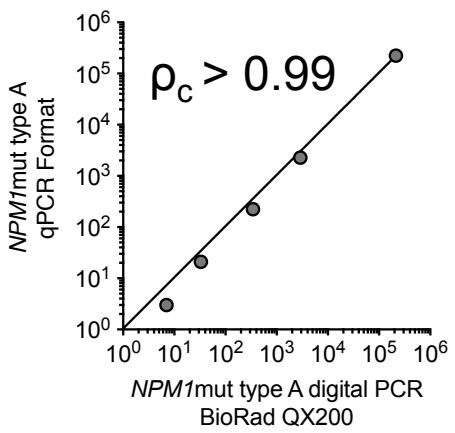**B**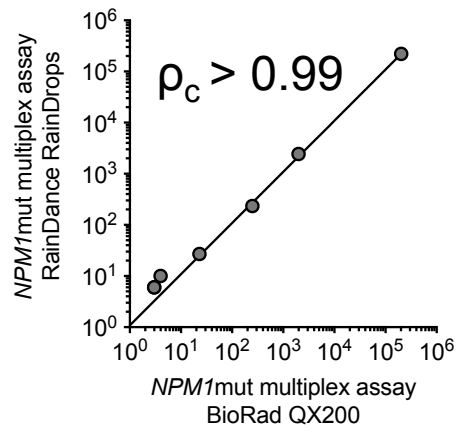**C**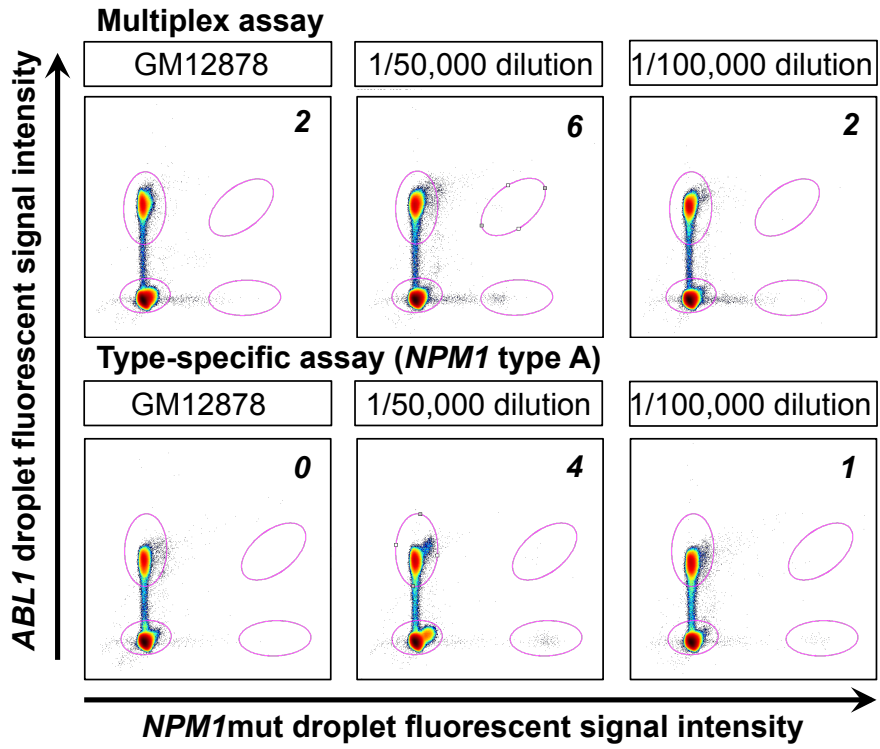

Supplement: mmc1.pdf [file mmc1.pdf]

**A**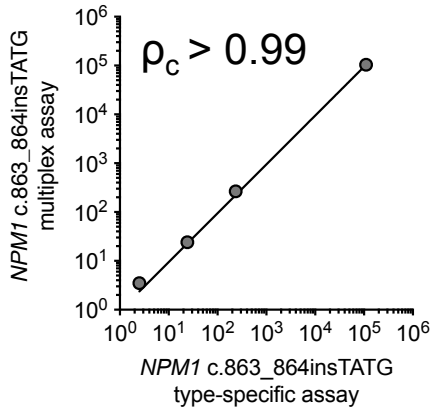**B**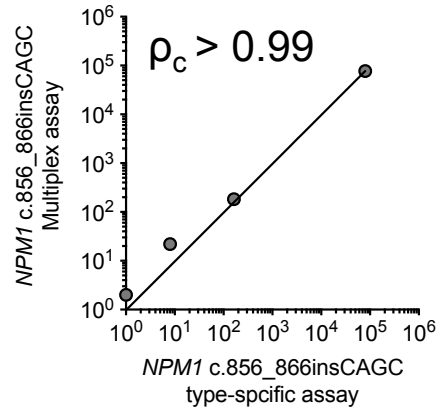**C**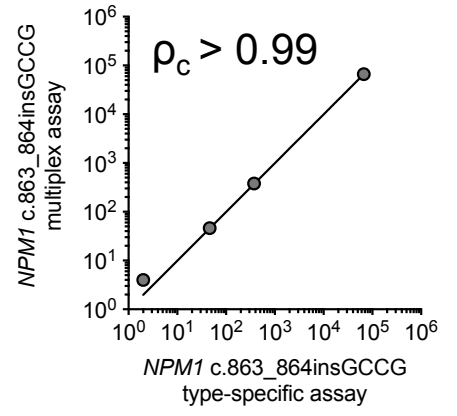

Supplement: mmc2.pdf [file mmc2.pdf]

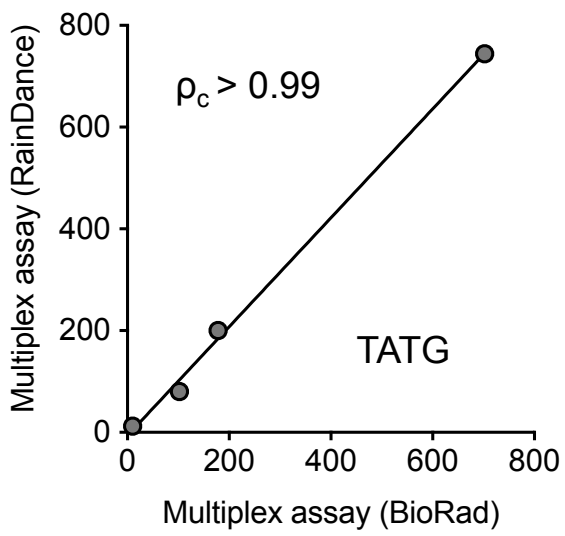

Supplement: mmc3.pdf [file mmc3.pdf]

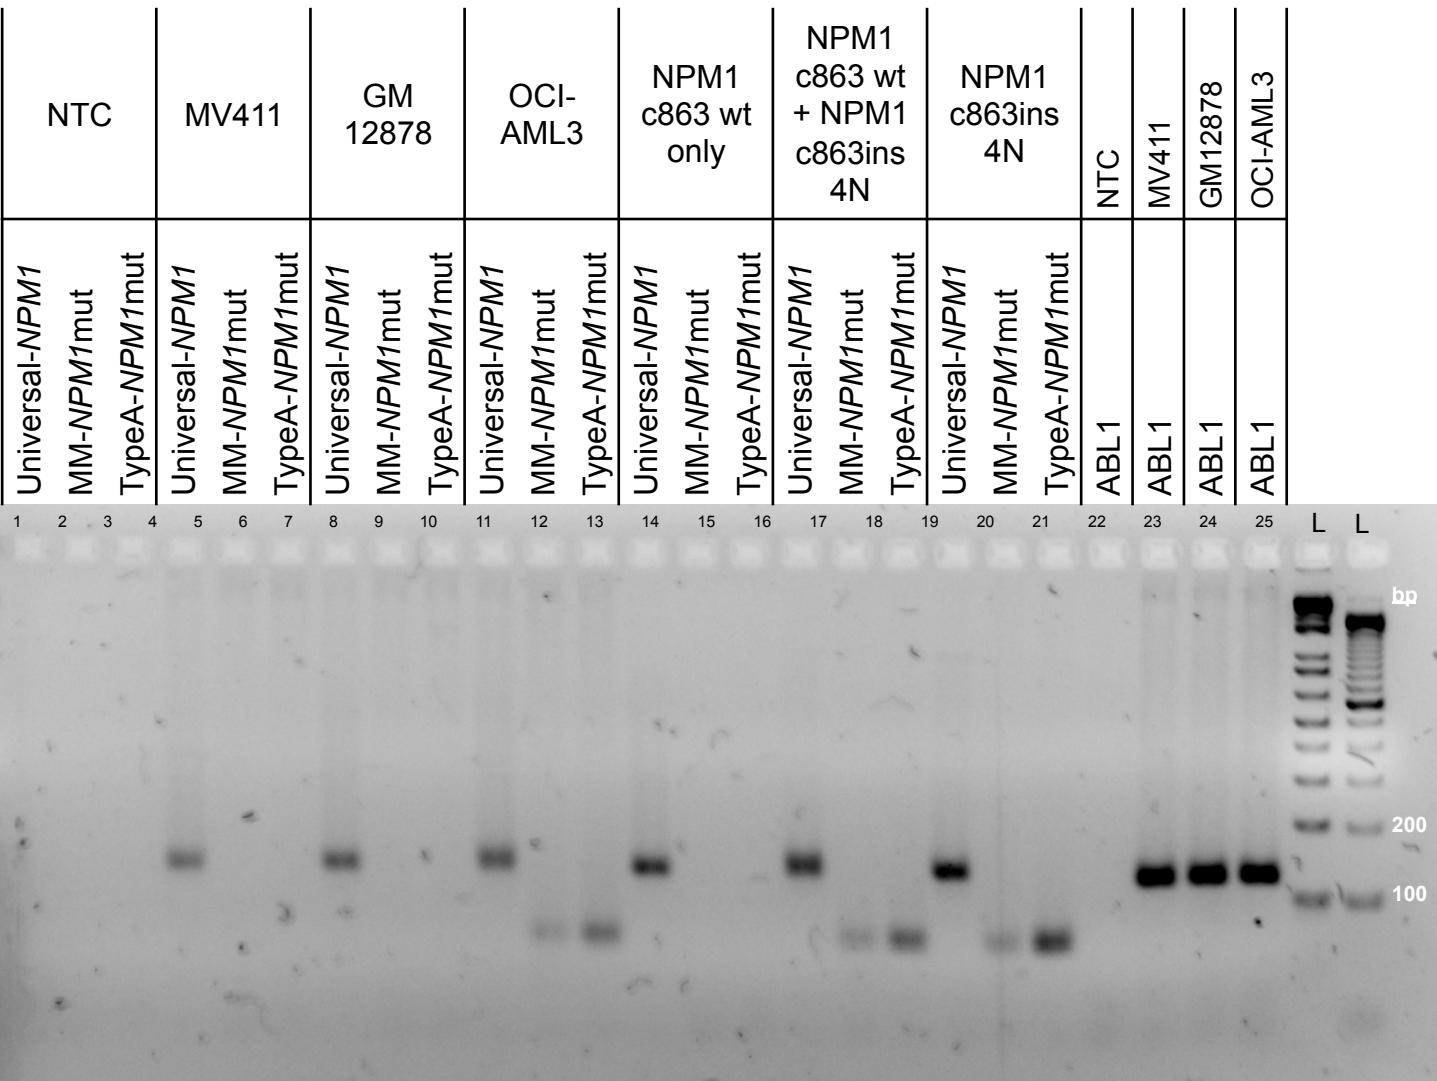

Supplement: mmc5.pdf [file mmc5.pdf]
